# Supplementary material
Source: PubMed Central journal article supplement (PMC5961092)
Supplement: ddy109_supplementary_figures-ch.pdf [file ddy109_supplementary_figures-ch.pdf]

**A** *IFT172* expression in *Ift172<sup>fl/fl</sup>iCre* retinas normalized to the control mice

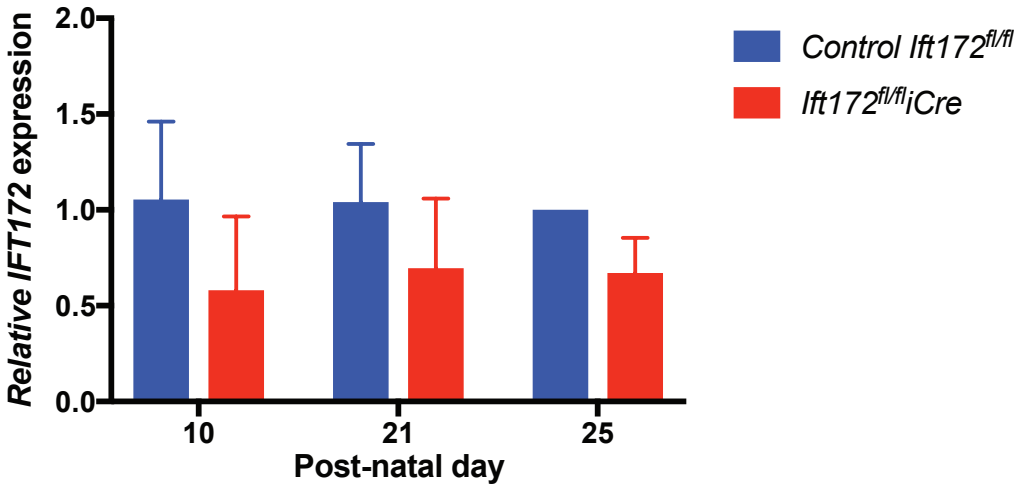

**B** *iCre* and *Rho* expression in *Ift172<sup>fl/fl</sup>iCre* mice

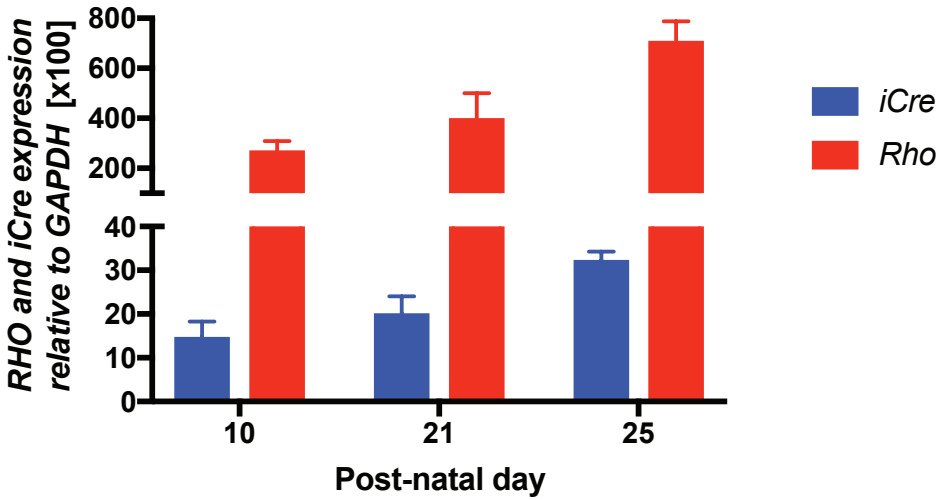

**C** *Rho* expression in *Ift172<sup>fl/fl</sup>iCre* and control mice

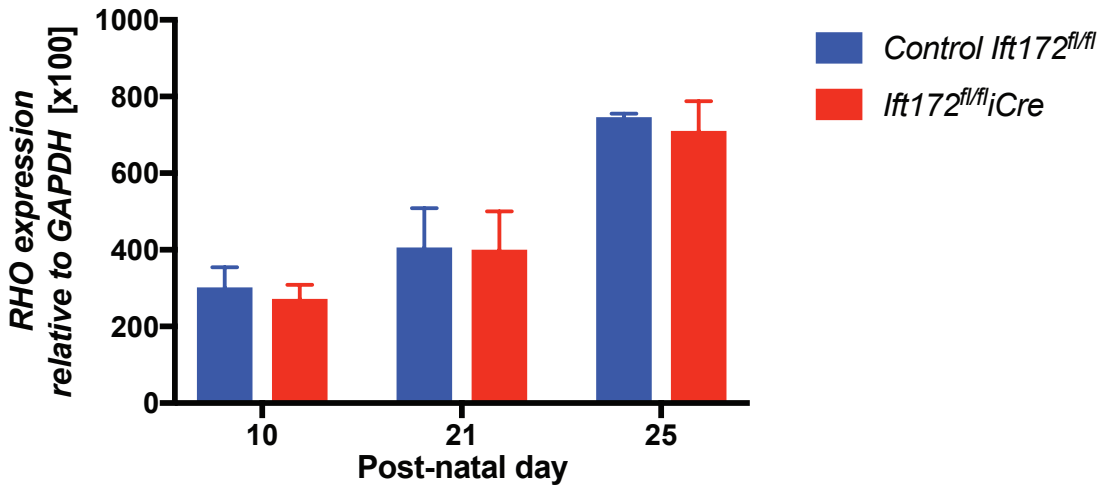

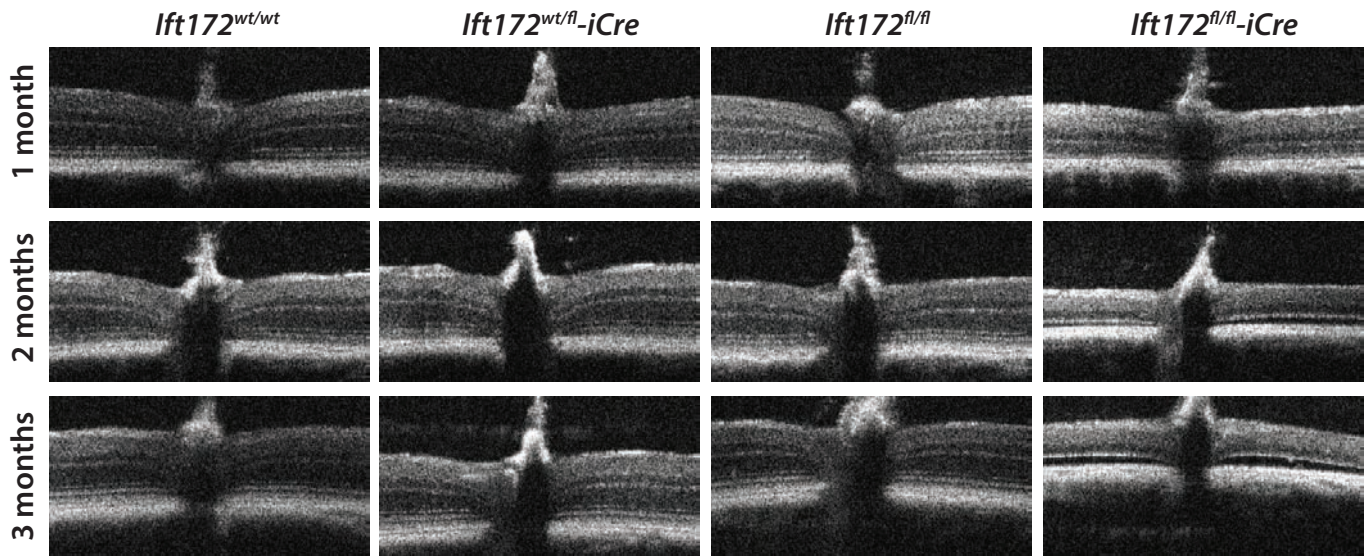

Supplementary Figure 2

### Rp1 staining length normalized by AcTub staining

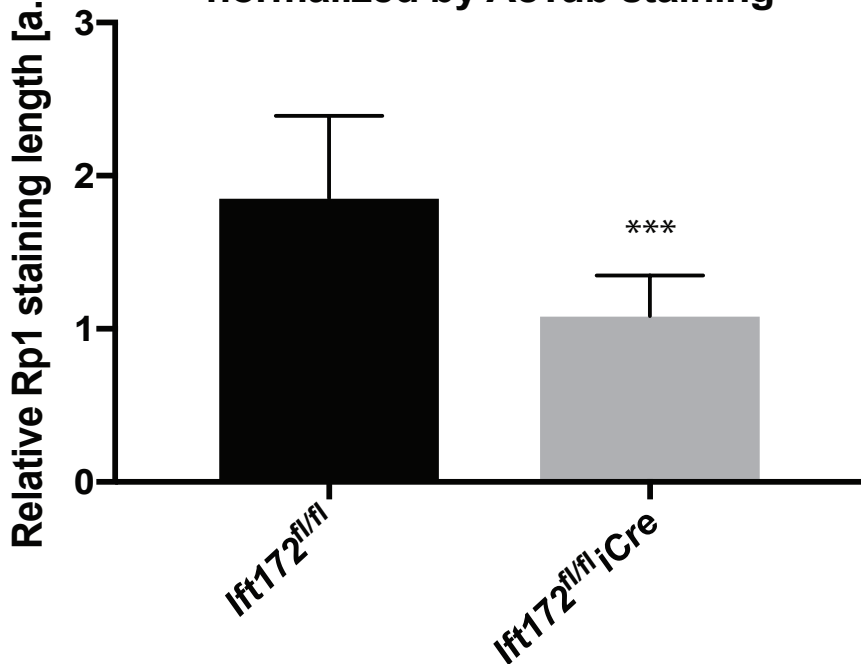

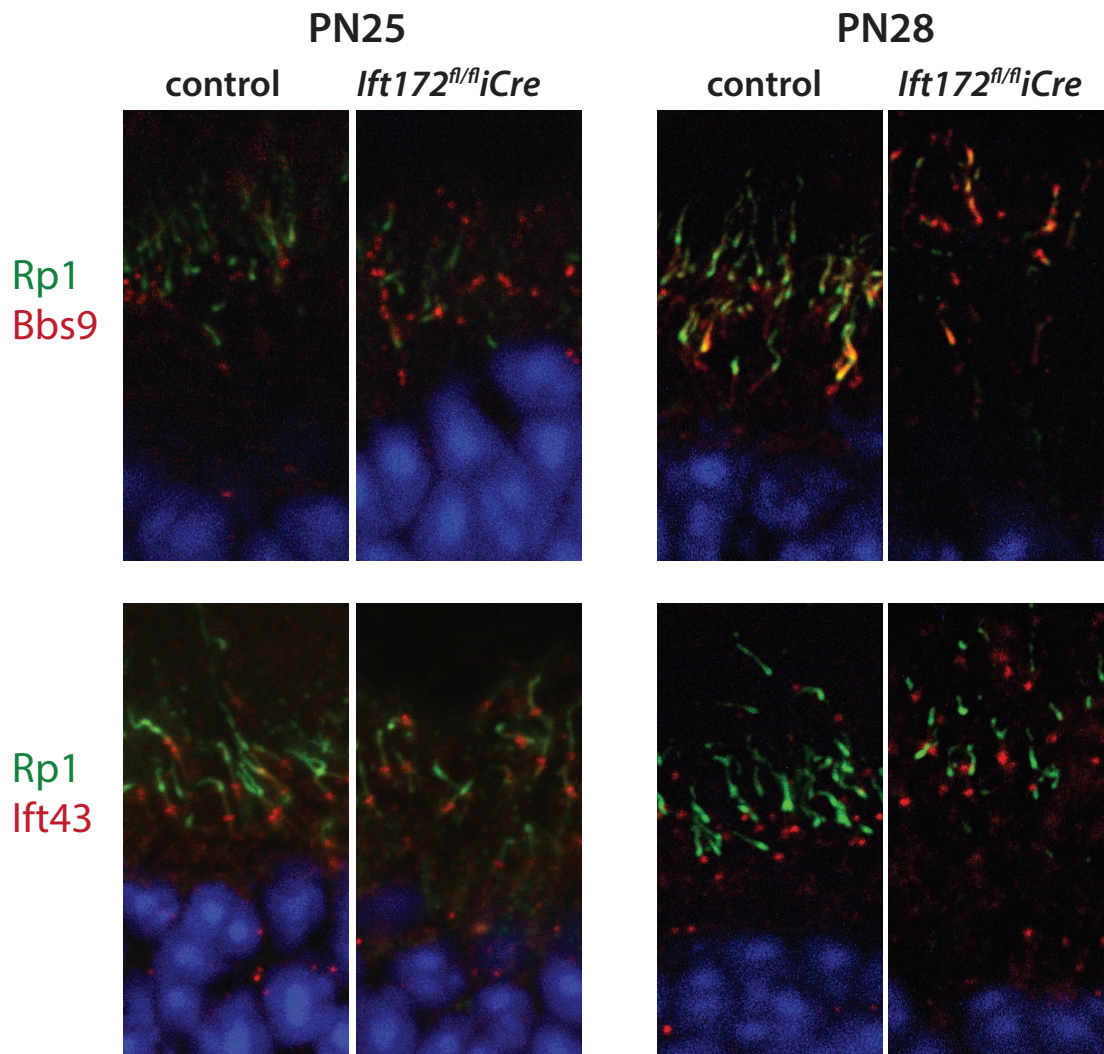

Supplementary Figure 4



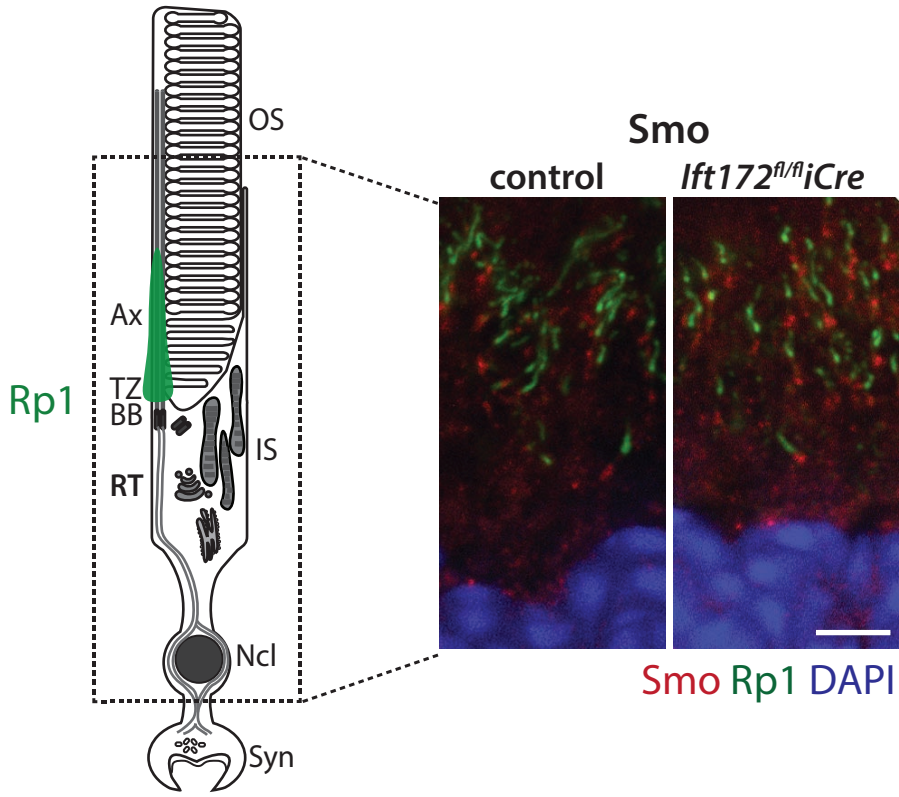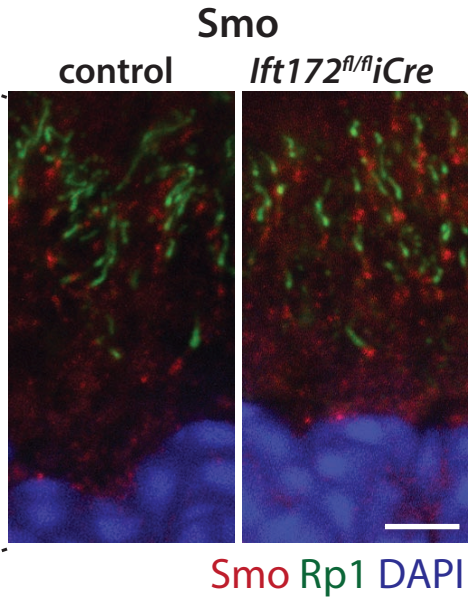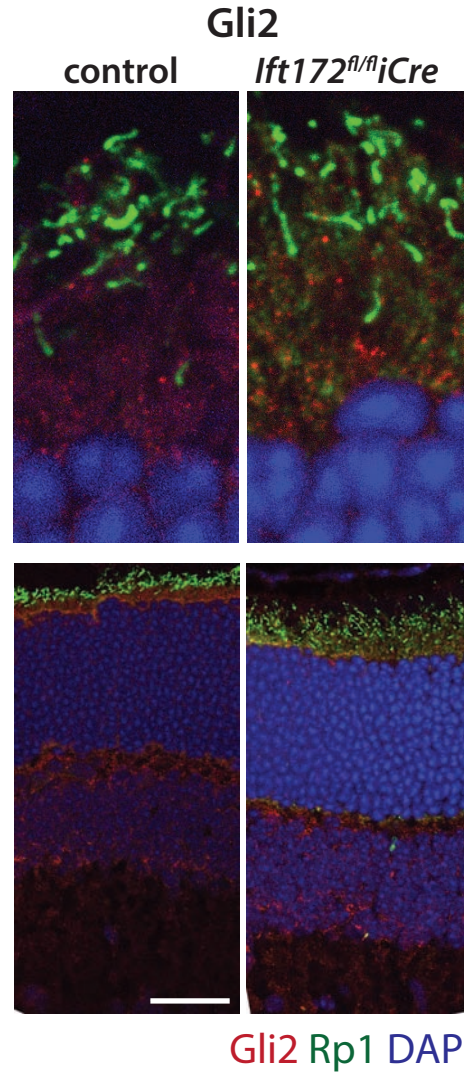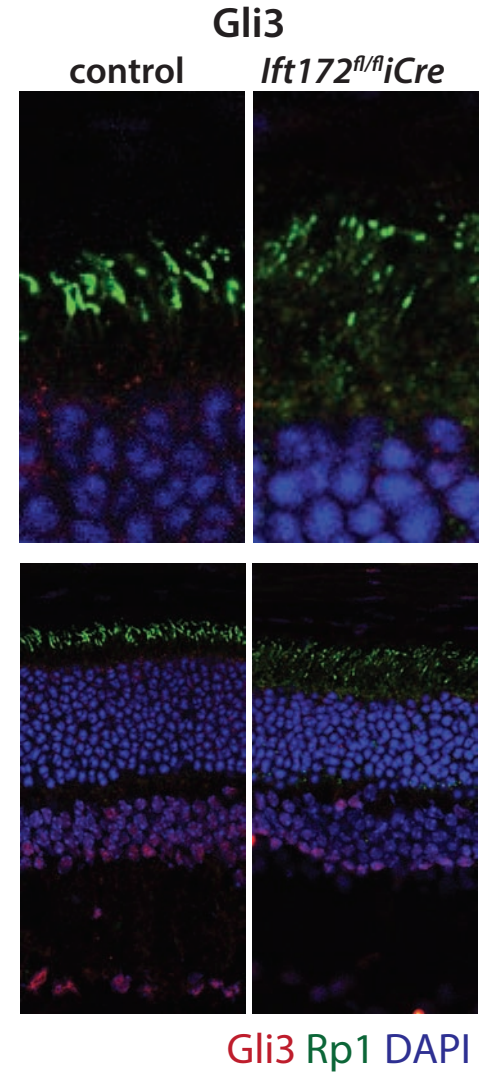

Supplementary Figure 5
